# Supplementary material for: Evaluation of the new role of the invasive species (Procambarus clarkii) as an environmental indicator in polluted watersheds
Source: Research Square preprint supplement (doi:10.21203/rs.3.rs-7781972/v1), 2025-10-20
Supplement: Supplementary file 1 [file 44ea26830e2a646f52ee2546.docx]

*Supplementary Table 1:*

| Sample | VR1 | VR2 | LA1 | LA2 | VR3 | VR4 | AS1 | VR5 | GR1 | VR6 | CONTROL |
| --- | --- | --- | --- | --- | --- | --- | --- | --- | --- | --- | --- |
| DHg (µg L-1) | 8.6 | 30.1 | 14.7 | 47.5 | 26.8 | 6.4 | 306.7 | 26.9 | 0.2 | 56.3 | *<LD* |
